# Supplementary material for: Prediction of regulatory targets of alternative isoforms of the epidermal growth factor receptor in a glioblastoma cell line
Source: PubMed Central journal article supplement (PMC6704634; doi:10.1186/s12859-019-2944-9), 2019-08-22
Supplement: 12859_2019_2944_MOESM1_ESM.pdf [file 12859_2019_2944_MOESM1_ESM.pdf]

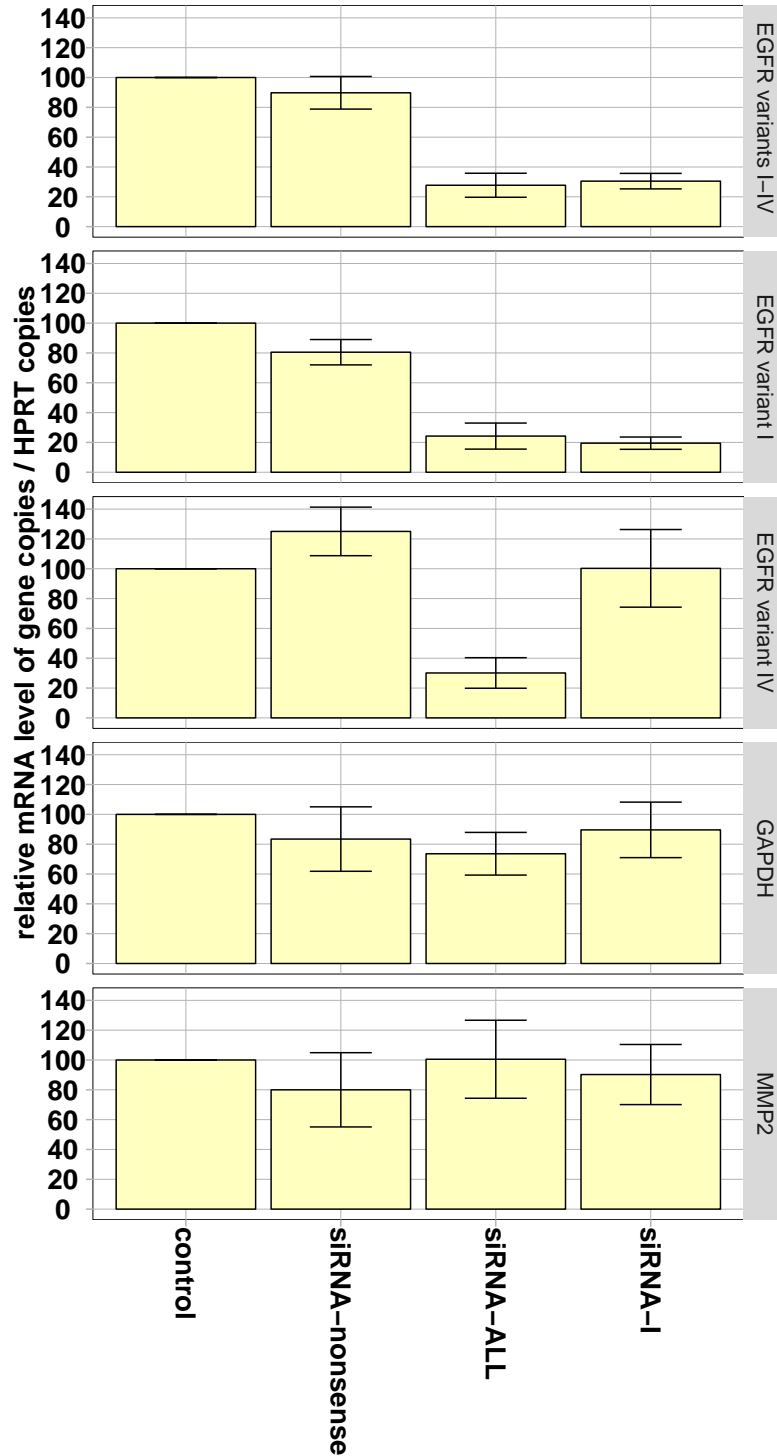

Figure S.1: Expression of *EGFR* splice variants, *GAPDH* and *MMP2* 48 hours after the application of three siRNA constructs (*siRNA<sub>nonsense</sub>* as control, *siRNA<sub>ALL</sub>*, *siRNA<sub>I</sub>*) the mRNA levels of all *EGFR* splice variants, full-length *EGFR* (*EGFR* splice variant I), *EGFR* splice variant IV, *GAPDH*, and *MMP2* were measured and normalized to *HPRT*. The analysis was performed with at least three independent experiments in the cell line SF767. Compared to the control experiments the *siRNA<sub>ALL</sub>* and the *siRNA<sub>I</sub>* reduced the levels of mRNA of all *EGFR* splice variants by about 70% and of *EGFR* splice variant I by about 75%. The *EGFR* splice variant IV was reduced only by the siRNA *siRNA<sub>ALL</sub>* and *siRNA<sub>I</sub>* did not affect the mRNA level. As expected, compared to the control experiment the mRNA levels of *GAPDH* and *MMP2* are not reduced.

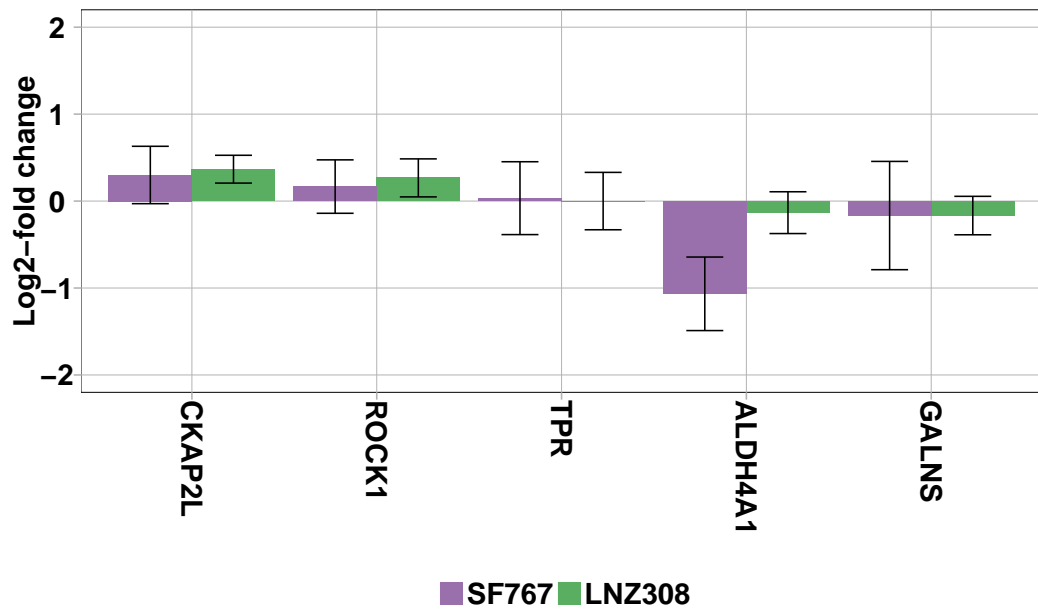

Figure S.2: **log<sub>2</sub>-fold changes of the qPCR expression levels for cell lines SF767 and LNZ308**  
 The cell lines (SF767 and LNZ308) were stimulated with the ligand EGF (50ng/ml for 24 hours) and the gene expressions of *CKAP2L*, *ROCK1*, *TPR*, *ALDH4A1* and *GALNS* were measured by qPCR experiments. The analysis were performed with at least three independent experiments for each cell lines. The log<sub>2</sub>-fold changes of the qPCR experiments were calculated for control without EGF vs control with EGF stimulation based on the  $\Delta\Delta CT$ -values compared to GAPDH. By the comparison of log<sub>2</sub>-fold changes of the cell lines SF767 and LNZ308, we could validate four genes (*CKAP2L*, *ROCK1*, *TPR*, and *GALNS*) by having overlapping error bars and detect that *ALDH4A1* was differently down-regulated in both cell lines.
